# Supplementary material for: Plasma evolution investigation and aging grade evaluation of heat resistant steel based on laser induced plasma images
Source: Royal Society of Chemistry journal article supplement (doi:10.1039/d4ja00368c), 2025-01-01
Supplement: d4ja00368c1.pdf [file d4ja00368c1.pdf]

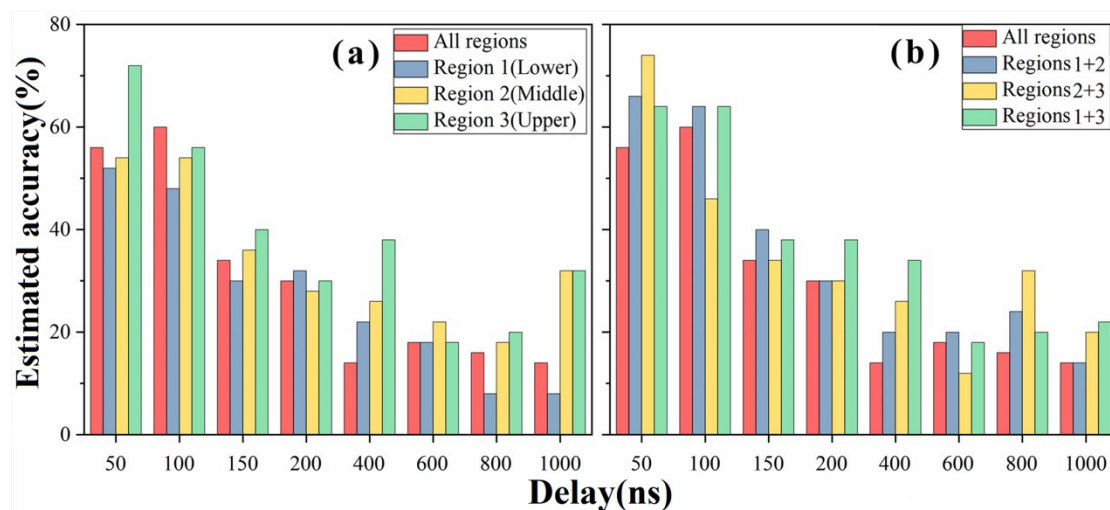

Evaluation accuracy of aging grade models based on plasma RSD image from different regions (4 shots RSD).

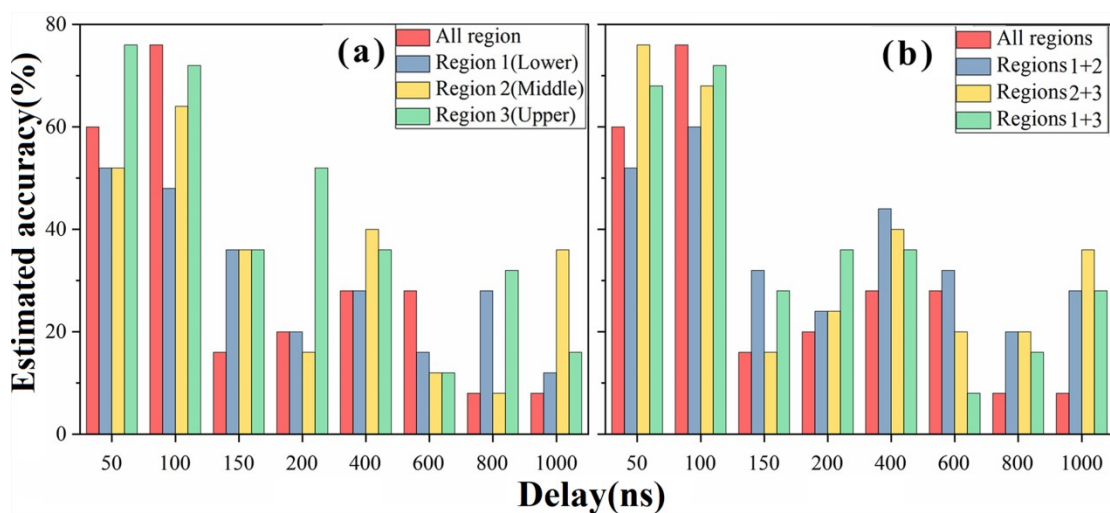

Evaluation accuracy of aging grade models based on plasma RSD image from different regions (8 shots RSD).
